# Supplementary material
Source: publisher figshare collection journal article supplement (https://acs.figshare.com/ndownloader/files/5106376)
Supplement: Supplementary file 1 [file 5106376]

# Supporting Information

## Ligand-Induced Disruption of Polyhedral $C_2@Ag_n$ Cage Assembly in Silver Acetylenediide Complexes

Xiao-Li Zhao and Thomas C. W. Mak\*

*Department of Chemistry, The Chinese University of Hong Kong, Shatin, New Territories,  
Hong Kong SAR, P. R. China*

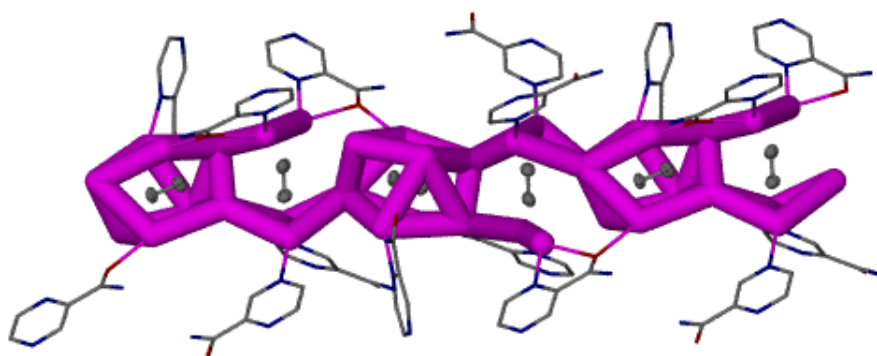

**Figure 3.** One-dimensional infinite column of **1** generated from fusion of  $C_2@Ag_8$  and  $Ag_6(\mu_6-C_2)$ . trifluoroacetate ligands and hydrogen atoms have been omitted for clarity. Color code: carbon, gray; nitrogen, blue; silver, purple; oxygen, red.

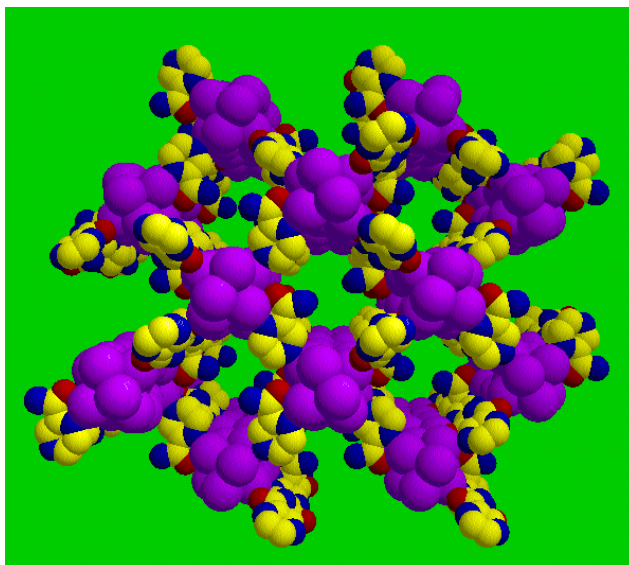

**Figure 4.** Space-filling drawing of the three-dimensional framework of **1**. Trifluoroacetate ligands have been omitted for clarity. Color code: carbon of pyz ring, yellow; nitrogen, blue; silver, purple; oxygen red.

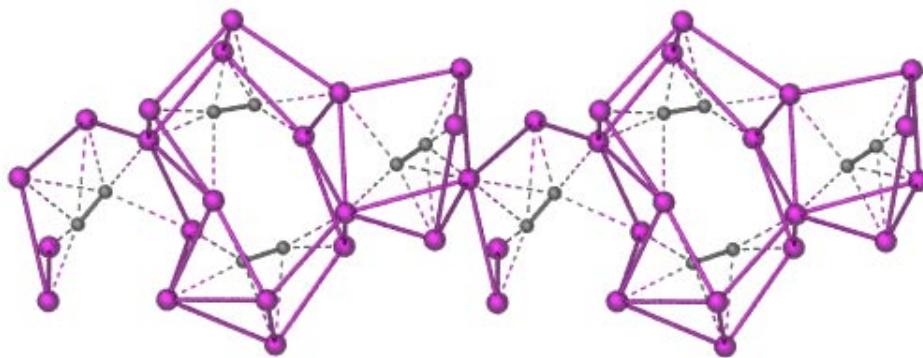

**Figure 5.** A portion of the ABCABC... silver column of **2** generated from the fusion of cage **A**, **B** and **C**.

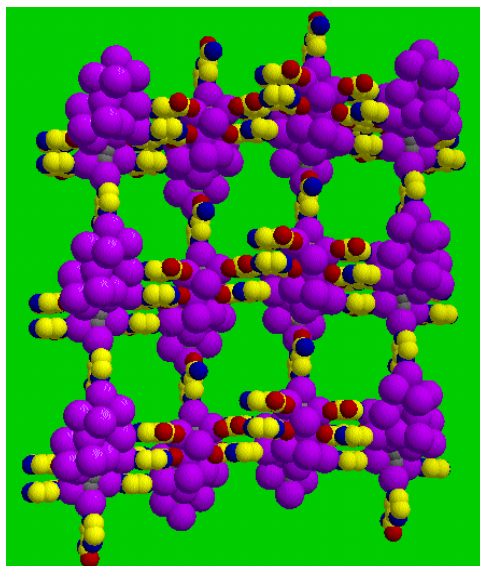

**Figure 6.** Space-filling drawing of the three-dimensional framework of **2**. Pentafluoropropionate ligands have been omitted for clarity. Color code: carbon of pyz ring, yellow; carbon of  $C_2^{2-}$ , gray; nitrogen, blue; silver, purple, oxygen red.
